# Supplementary material
Source: PubMed Central journal article supplement (PMC7843233)
Supplement: jci-131-142434-s207.pdf [file jci-131-142434-s207.pdf]

## **Somatic reversion of pathogenic *DOCK8* variants alters lymphocyte differentiation and function, resulting in clinical improvement and effective cure of *DOCK8* deficiency**

Bethany A Pillay<sup>1,2\*</sup>, Mathieu Fusaro<sup>3,4,12\*</sup>, Paul E Gray<sup>5,6,7</sup>, Aaron L Statham<sup>1</sup>, Leslie Burnett<sup>1,7</sup>, Liliana Bezrodnik<sup>8</sup>, Alisa Kane<sup>1,2,7,9,10,11</sup>, Winnie Tong<sup>7,10</sup>, Chrystelle Abdo<sup>12</sup>, Sarah Winter<sup>3,13,14</sup>, Samuel Chevalier<sup>4</sup>, Romain Levy<sup>3,14</sup>, Cécile Masson<sup>15</sup>, Yohann Schmitt<sup>16,17</sup>, Christine Bole<sup>16</sup>, Marion Malphettes<sup>18</sup>, Elizabeth Macintyre<sup>19</sup>, Jean-Pierre De Villartay<sup>3,20</sup>, Joanne M Smart<sup>21</sup>, Jane Peake<sup>22</sup>, Asghar Aghamohammadi<sup>23</sup>, Lennart Hammarström<sup>24</sup>, Hassan Abolhassani<sup>23,24</sup>, Capucine Picard<sup>3,4,13,14</sup>, Alain Fischer<sup>3,14,25</sup>, Sylvain Latour<sup>3,13</sup>, Benedicte Neven<sup>3,14</sup>, Stuart G Tangye<sup>1,2,7#</sup>, Cindy S Ma<sup>1,2,7#</sup>.

<sup>1</sup>Garvan Institute of Medical Research, Sydney, NSW, Australia

<sup>2</sup>St Vincent's Clinical School, Faculty of Medicine, UNSW Sydney, NSW, Australia

<sup>3</sup>Paris University, Imagine Institute, Université de Paris, Institut National de la Santé et de la Recherche Médicale (INSERM) UMR 1163, Paris, France, EU

<sup>4</sup>Study Center for Primary Immunodeficiencies, Assistance Publique-Hôpitaux de Paris (AP-HP), Necker Hospital for Sick Children, Paris, France, EU

<sup>5</sup>Department of Immunology and Infectious Diseases, Sydney Children's Hospital, Australia

<sup>6</sup>School of Women's and Children's Health, UNSW Sydney, NSW, Australia

<sup>7</sup>Clinical Immunogenomics Research Consortia of Australasia, Sydney, NSW, Australia

<sup>8</sup>Clinical Immunology Center and Immunology Unit, Ricardo Gutiérrez Children Hospital, Ciudad Autónoma de Buenos Aires, Argentina

<sup>9</sup>South Western Sydney Clinical School, Faculty of Medicine, UNSW Sydney Australia, Sydney, Australia.

<sup>10</sup>HIV and Immunology Unit, St Vincent's Hospital, Sydney, Australia.

<sup>11</sup>Department of Immunology, Allergy and HIV, Liverpool Hospital, Liverpool, Sydney, Australia.

<sup>12</sup>Biological Hematology, Paris University, Assistance Publique - Hôpitaux de Paris and Institut Necker Enfants Malades (INEM), Paris, France, EU

<sup>13</sup>Laboratory of Lymphocyte Activation and Susceptibility to EBV infection, Institut National de la Santé et de la Recherche Médicale (INSERM) UMR 1163, Imagine institut, Paris, France, EU

<sup>14</sup>Pediatric Hematology and Immunology Unit, Necker Hospital for Sick Children, AP-HP, Paris, France, EU

<sup>15</sup>Paris University, Imagine Institute, Bioinformatics Platform, INSERM UMR 1163, 75015 Paris, France, EU

<sup>16</sup>Genomic Core Facility, INSERM UMR1163, Imagine Institute, Paris, France, EU

<sup>17</sup>INSERM US24/CNRS UMS3633, Paris Descartes Sorbonne Paris Cite University, Paris, France

<sup>18</sup>Immuno-Pathologie Clinique, APHP, Hôpital Saint-Louis, Paris, France, EU

<sup>19</sup>Laboratory of Onco-Hematology, Institut Necker Enfants Malades, Paris, France, EU

<sup>20</sup>Laboratory of Genome Dynamics in The Immune System, INSERM UMR1163, Paris, France, EU

<sup>21</sup>Royal Children's Hospital, Melbourne, Australia

<sup>22</sup>Queensland Children's Hospital, South Brisbane, Australia

<sup>23</sup>Research Center for Immunodeficiencies, Children's Medical Center, Tehran University of Medical Sciences, Tehran, Iran

<sup>24</sup>Division of Clinical Immunology, Department of Laboratory Medicine, Karolinska University Hospital Huddinge, Karolinska Institute, Stockholm, Sweden

<sup>25</sup> Collège de France, Paris, France, EU

\* BAP and MF: equal contribution as first authors

# SGT and CSM: equal contribution as senior authors

### **Conflict of Interest**

The authors have declared that no conflict of interest exists

### **Corresponding authors**

Cindy Ma, Stuart Tangye

Garvan Institute of Medical Research

384 Victoria St, Darlinghurst. NSW. 2010 Australia

Phone: +61 2 9295 8455; Fax: +61 2 9295 8404

e-mail: [c.ma@garvan.org.au](mailto:c.ma@garvan.org.au)

[s.tangye@garvan.org.au](mailto:s.tangye@garvan.org.au)

***Running title:*** *DOCK8 reversion can lead to clinical improvement and effective disease cure*

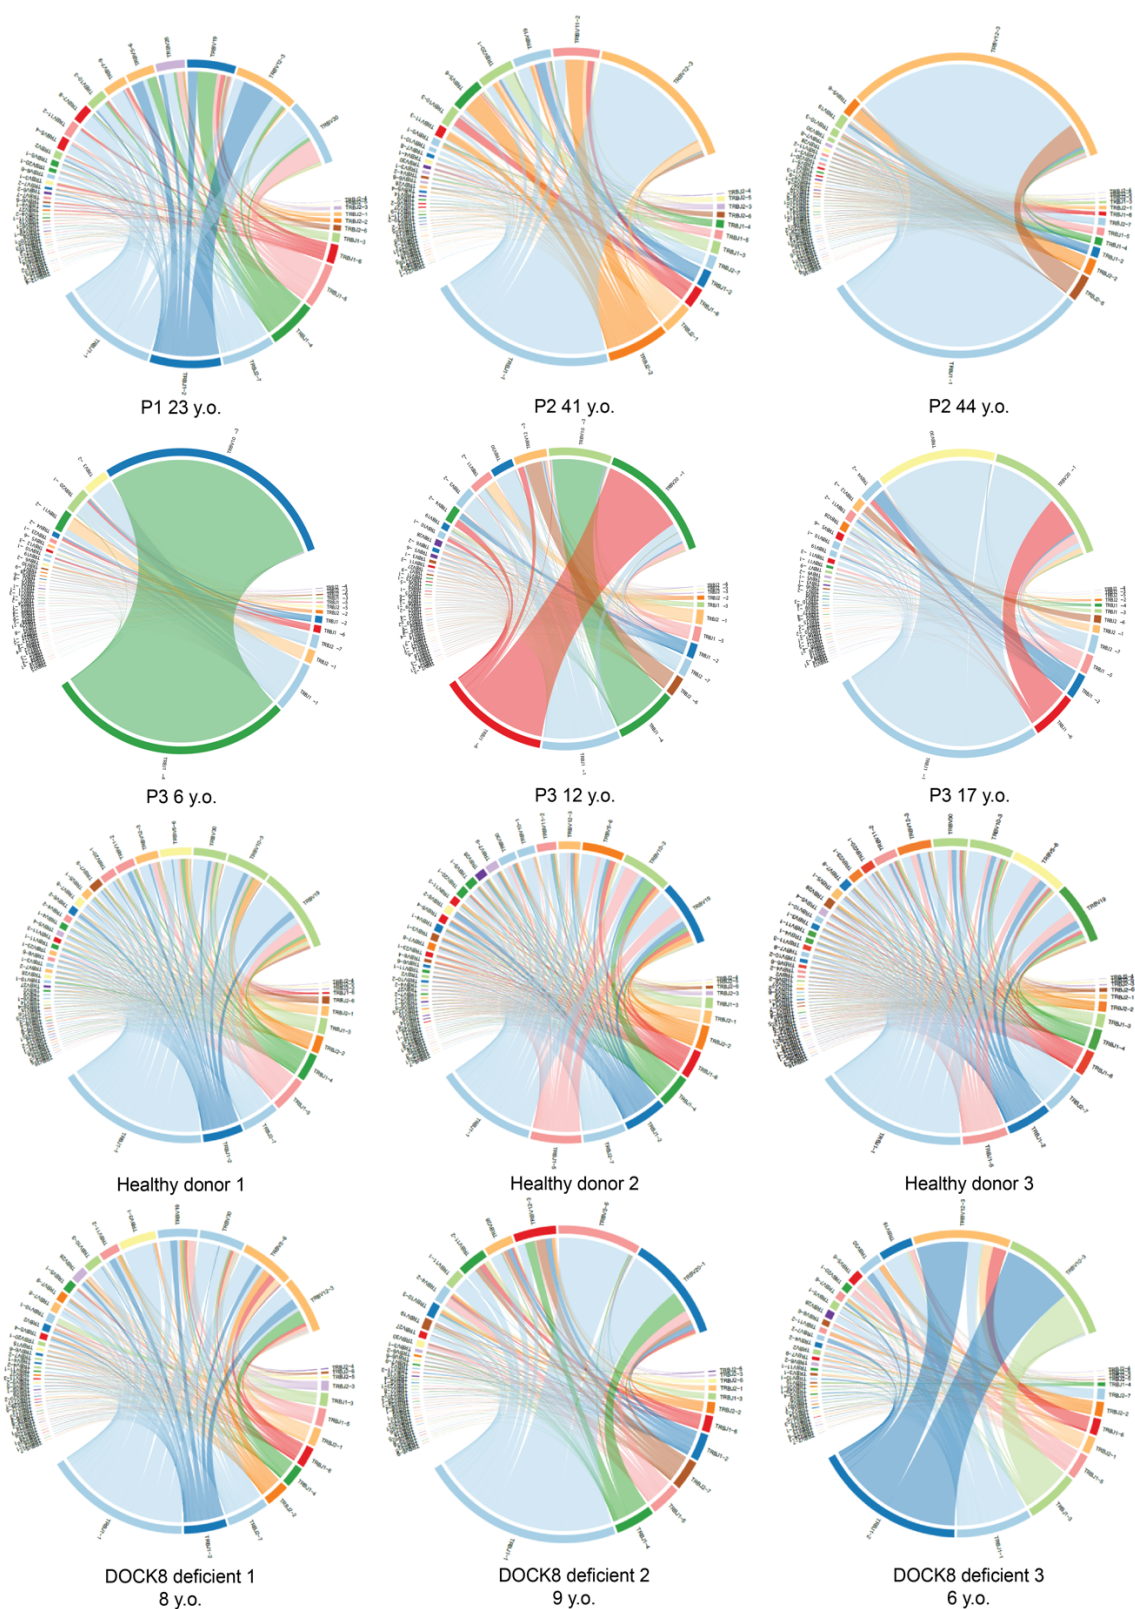

### Supplemental Figure 1: TCR $\beta$ repertoire evaluation

Sequencing of TCR beta genes was performed using genomic DNA extracted from blood samples from healthy donors (HD#1, #2, #3), DOCK8-deficient patients (n=3), P1, P2 (at 2 time points) and P3 (at 3 time points) using multiplex PCR and Euro-Clonality primers. Primary analysis was carried on with IMGT-HighVquest analysis tool. Figures were generated using VDJtools software. Evolution of TRB repertoire in P2 across time was visualized using chord diagrams showing VJ usage.

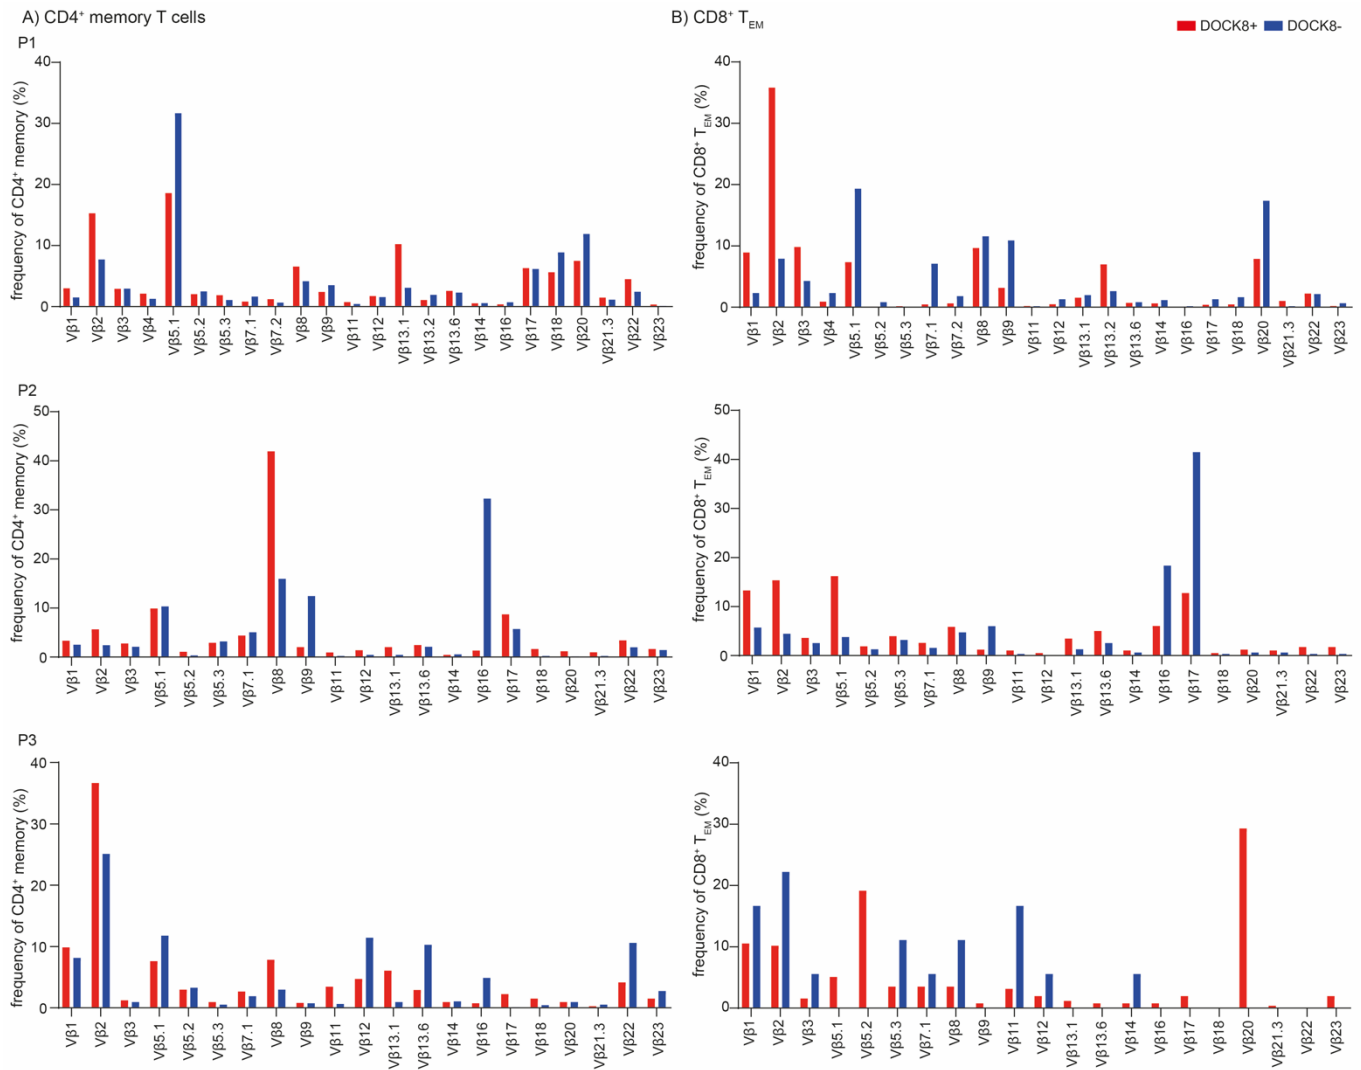

### Supplementary Figure 2: DOCK8<sup>-</sup> vs DOCK8<sup>+</sup> TCR repertoire

DOCK8-revertant patient PBMCs were stained for surface expression of CD4, CD8, CCR7 and CD45RA as well as Vβ diversity using the Vβ repertoire kit and then intracellularly stained for DOCK8 to identify DOCK8<sup>-</sup> and DOCK8<sup>+</sup> cells. The frequency of cells expressing different Vβ chains in (A) CD4<sup>+</sup> memory (CD4<sup>+</sup> CD45RA<sup>-</sup>) and (B) CD8<sup>+</sup> T<sub>EM</sub> T cells was determined by flow cytometry.

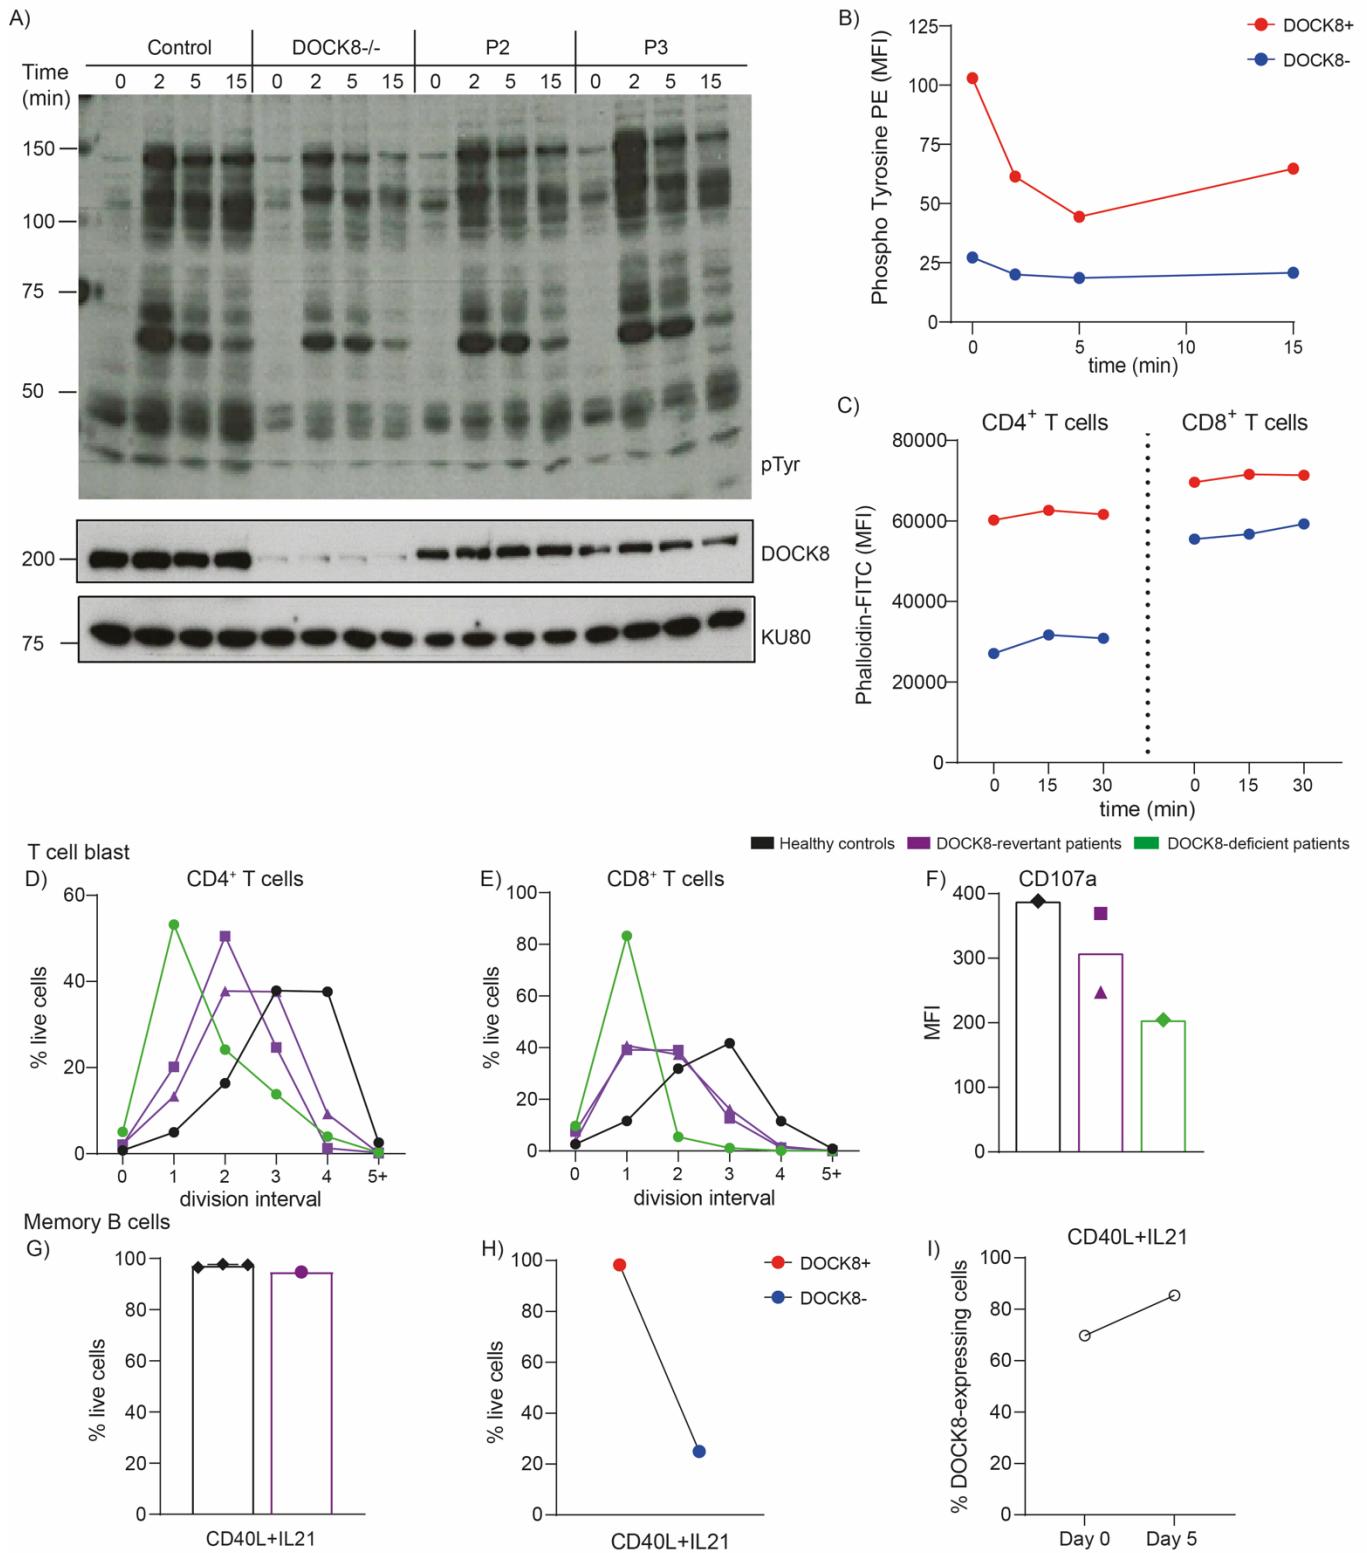

**Supplementary Figure 3: Further functional assessment of DOCK8-revertant patients.**

(A) T cells blasts from P2 and P3 were activated by anti-CD3 mAb plus crosslinking Ab; activation was stopped with lysis buffer at the indicated times. Global phosphorylation was evaluated by immunoblotting with anti-phosphotyrosine antibody (upper blot). Expression of DOCK8 and KU80 (as loading control) are also shown. Size markers on the left. (B) PHA-blasts from P1 were stimulated with anti-CD3 mAb, followed by crosslinking, and fixed at the indicated times. Global tyrosine phosphorylation in DOCK8<sup>-</sup> and DOCK8<sup>+</sup> cells was evaluated by permeabilisation and staining with anti-phosphotyrosine mAb and

DOCK8 followed by flow cytometric analysis. (C) PBMCs from P1 were treated with IL-2 for the indicated time. F-actin content in DOCK8<sup>-</sup> and DOCK8<sup>+</sup> cells was assessed by surface staining for CD3, CD4 and CD8 and intracellular staining for Phalloidin-FITC and DOCK8 followed by flow cytometry. (D-F) T cell blasts from a healthy donor, P2, P3 and a DOCK8-deficient patient were labelled with cell trace violet and cultured for 7 days with anti-CD3 mAb and then stained for CD4 and CD8 to determine proliferation of (D) CD4<sup>+</sup> T cells and (E) CD8<sup>+</sup> T cells or (F) stimulated for 3hr with anti-CD3 and stained for CD107a and CD8. (G-I) Sorted memory B cells from healthy donors (n=3) and P1 were stained with a live/dead cell marker and intracellularly stained to detect DOCK8 after 5 days of in vitro culture with CD40L+IL21 to determine survival of (G) total cells and of (H) DOCK8<sup>-</sup> and DOCK8<sup>+</sup> cells and (I) proportion of DOCK8-expressing cells. (P1 ●, P2 ■, P3 ▲).

## **Supplementary methods**

### **Cell culture**

Memory B cells were isolated as CD20<sup>+</sup> CD27<sup>+</sup> cells and cultured with CD40L (200ng/ml) and IL21 (50ng/ml). T cell blasts were generated either by culturing PBMCs for 72h with 2.5ug/ml PHA or with the additional steps of dead cells removal by Ficoll-Paque density-gradient centrifugation and subsequent culture with 100IU/ml human IL2. To determine proliferation, T cell blasts were synchronised, labelled with CellTrace violet dye and cultured with anti-CD3 before being stained for CD4 and CD8 and assessed by dilution of CellTrace violet. CD107a staining was carried out on T cell blasts stimulated for 3h with immobilised anti-CD3 and stained for CD8.

### **F-actin measurement**

PBMC were incubated with 125U/ml IL2 for various times before being washed with PBS and stained for surface markers and live/dead cell marker. Cells were then fixed and permeabilised with saponin and stained with Phalloidin-FITC and anti-DOCK8 Ab/ anti-rabbit IgG Alexa-647 secondary Ab.

### **Phospho-tyrosine assessment**

Stimulation of cells, protein extraction, and immunoblotting protocols have been described previously (57, 58). Briefly, cells ( $5 \times 10^6$  cells per ml) were stimulated by anti-CD3 antibody and cross-linked with a rabbit anti-mouse IgG for the designated time periods. Cells were washed in PBS, and proteins were extracted with cell lysis buffer (1% NP-40 [NP-40 alternative; Calbiochem], 50 mM Tris, pH 8, 150 mM NaCl, 20 mM EDTA, 1 mM Na<sub>3</sub>VO<sub>4</sub>, 1 mM NaF, complete protease inhibitor cocktail [Roche], and phosphatase inhibitor cocktails 2 and 3 [Sigma]). Proteins were denatured by boiling for 10 min with sample buffer (125 mM Tris, pH 6.8, 3% SDS, 10% glycerol, 5% 2 $\beta$ -mercaptoethanol, and 0.01% bromophenol blue), separated by SDS-PAGE, and transferred on polyvinylidene fluoride membrane (Millipore). Membranes were blocked with milk or BSA-based buffer before incubation with antibodies. The following antibodies were used for immunoblotting: anti-phosphorylated tyrosine (P-Tyr-100, #9411S, Cell Signaling Technology), anti-Ku80 (C48E7, #2180, Cell Signaling Technology), anti-DOCK8 (G-2, sc-376911, Santa Cruz). Membranes were then washed and incubated with secondary anti-mouse (GE-Healthcare) or anti-rabbit (Cell Signaling Technology) HRP-linked antibodies. Pierce ECL WB substrate and Bio-Rad Clarity ECL substrate were used for revelation. For reprobing, membranes were incubated with Restore WB stripping buffer (Thermo Scientific) before blocking.

For flow cytometric evaluation of phosphotyrosine, PHA blasts were stimulated with 1 $\mu$ g/ml anti-CD3 mAb for 30s before crosslinking with 2 $\mu$ g/ml goat anti-mouse IgG for various time at 37°C. Cells were washed in and fixed with 1.5% formaldehyde for 20min at 4°C. Cells were permeabilised with methanol for 10min at 4°C and stained with PE-conjugated anti-phosphotyrosine and anti-DOCK8 Abs before additional staining with anti-rabbit Alexa-647 secondary antibody.

## Supplementary References

1. Martin, E., Palmic, N., Sanquer, S., Lenoir, C., Hauck, F., Mongellaz, C., Fabrega, S., Nitschké, P., Esposti, M.D., Schwartzenruber, J., et al. 2014. CTP synthase 1 deficiency in humans reveals its central role in lymphocyte proliferation. *Nature* 510:288-292.
2. Winter, S., Martin, E., Boutboul, D., Lenoir, C., Boudjemaa, S., Petit, A., Picard, C., Fischer, A., Leverger, G., and Latour, S. 2018. Loss of RASGRP1 in humans impairs T-cell expansion leading to Epstein-Barr virus susceptibility. *EMBO Mol Med* 10:188-199.



**Supplementary Table 1: Antibodies and reagents used**

| Target-Fluorochrome              | Supplier                   | Catalog number |
|----------------------------------|----------------------------|----------------|
| CCR7-PECy7                       | BioLegend                  | 353226         |
| CD107a-PE                        | Becton Dickson Biosciences | 555801         |
| CD10-APC                         | Becton Dickson Biosciences | 340923         |
| CD10-APCR700                     | Becton Dickson Biosciences | 659120         |
| CD10-BV650                       | Becton Dickson Biosciences | 563734         |
| CD10-BUV737                      | Becton Dickson Biosciences | 564959         |
| CD127-BV421                      | BioLegend                  | 351310         |
| CD127-BV650                      | BioLegend                  | 351326         |
| CD161-BV786                      | Becton Dickson Biosciences | 744096         |
| CD161-PerCPCy5.5                 | eBioscience                | 45-1619-42     |
| CD20-BUV805                      | Becton Dickson Biosciences | 612905         |
| CD20-PE                          | Becton Dickson Biosciences | 346595         |
| CD25-BUV563                      | Becton Dickson Biosciences | 612918         |
| CD25-FITC                        | Becton Dickson Biosciences | 347643         |
| CD27-BB515                       | Becton Dickson Biosciences | 564642         |
| CD27-BV786                       | Becton Dickson Biosciences | 563327         |
| CD28-PerCPCy5.5                  | Becton Dickson Biosciences | 560685         |
| CD3-BV421                        | Becton Dickson Biosciences | 562426         |
| CD3-BV570                        | BioLegend                  | 300346         |
| CD3-BV786                        | Becton Dickson Biosciences | 565491         |
| CD45RA-BV605                     | Becton Dickson Biosciences | 562886         |
| CD45RA-BUV395                    | Becton Dickson Biosciences | 740298         |
| CD4-APCCy7                       | Becton Dickson Biosciences | 557871         |
| CD4-BV510                        | Becton Dickson Biosciences | 562970         |
| CD4-BUV737                       | Becton Dickson Biosciences | 564305         |
| CD56-BB790                       | Becton Dickson Biosciences | 624296         |
| CD56-BV605                       | BioLegend                  | 318334         |
| CD57-FITC                        | Becton Dickson Biosciences | 555619         |
| CD57-PE                          | BioLegend                  | 322311         |
| CD8-APCCy7                       | BioLegend                  | 301016         |
| CD8-BUV496                       | Becton Dickson Biosciences | 612942         |
| CD8-PerCPCy5.5                   | Becton Dickson Biosciences | 560662         |
| DOCK8                            | Abcam                      | ab175208       |
| Goat anti-rabbit IgG (H&L)-AF647 | Abcam                      | ab150083       |
| GranzymeB-AF700                  | Becton Dickson Biosciences | 560213         |
| IFN $\gamma$ -BV605              | Becton Dickson Biosciences | 562974         |
| IL2-BV650                        | Becton Dickson Biosciences | 564166         |

| IL4-PECy7                                    | eBioscience                | 25-7049-82 |
|----------------------------------------------|----------------------------|------------|
| IL21-e660                                    | eBioscience                | 50-7219-42 |
| IL22-PE                                      | eBioscience                | 12-7229-42 |
| PD1-BV605                                    | Becton Dickson Biosciences | 563245     |
| PD1-PECF594                                  | Becton Dickson Biosciences | 565024     |
| Perforin-PECy7                               | BioLegend                  | 353316     |
| Phalloidin-FITC                              | Sigma Aldrich              | P5282      |
| Phosphotyrosine-PE                           | Becton Dickson Biosciences | 558008     |
| Rabbit IgG isotype control                   | Abcam                      | ab172730   |
| TCR $\alpha\beta$ -PECy7                     | BioLegend                  | 306720     |
| TCR $\alpha\beta$ -BUV737                    | Becton Dickson Biosciences | 613014     |
| TCR $\gamma\delta$ -PerCPe710                | eBioscience                | 46-9959-41 |
| TCR $\gamma\delta$ -BV711                    | Becton Dickson Biosciences | 745505     |
| TCRV $\alpha$ 24-FITC                        | Beckman Coulter            | IM1589     |
| TCRV $\alpha$ 24-JaQ BV605                   | Becton Dickson Biosciences | 743999     |
| TCRV $\alpha$ 7.2-BV421                      | BioLegend                  | 351715     |
| TCRV $\beta$ 11-PE                           | Beckman Coulter            | IM2290     |
| TNF $\alpha$ -BUV395                         | Becton Dickson Biosciences | 563996     |
| Reagent                                      | Supplier                   |            |
| Anti-CD3 (OKT3)                              | eBioscience                |            |
| Anti-mouse IgG (rabbit)                      | Abcam                      |            |
| Anit-mouse IgG (goat)                        | Jackson ImmunoResearch     |            |
| Brefeldin A                                  | Sigma-Aldrich              |            |
| Carboxyfluorescein succinimidyl ester (CFSE) | Invitrogen                 |            |
| CD40L                                        | R&D Systems                |            |
| Cell trace violet dye                        | Invitrogen                 |            |
| Ionomycin                                    | Sigma-Aldrich              |            |
| Phorbol 12-myristate 13-acetate (PMA)        | Sigma-Aldrich              |            |
| Phytohemagglutinin (PHA)                     | Sigma-Aldrich              |            |
| recombinant human IL-2                       | R&D Systems                |            |
| recombinant human IL-21                      | PeptoTech                  |            |
| saponin                                      | Sigma-Aldrich              |            |
| T-cell activation and expansion (TAE) beads  | Miltenyi Biotech           |            |
| TCR V $\beta$ repertoire kit                 | Beckman Coulter            |            |
| Zombie aqua fixable dye                      | BioLegend                  |            |

AF, Alexa fluor; APC, allophycocyanin; BB, brilliant blue; BUV, brilliant ultra violet; BV, brilliant violet; FITC, fluorescein isothiocyanate; PE, phycoerythrin; PerCP, peridinin-chlorophyll-protein complex.
